# Supplementary material for: Plasma mir-203a-3p as a Novel Diagnostic Biomarker in Patients with Parkinson’s Disease Dementia
Source: Preprints.org preprint supplement (doi:10.20944/preprints202401.0410.v1), 2024-01-04
Supplement: Supplementary file 1 [file supplementary]

## Supplementary Materials

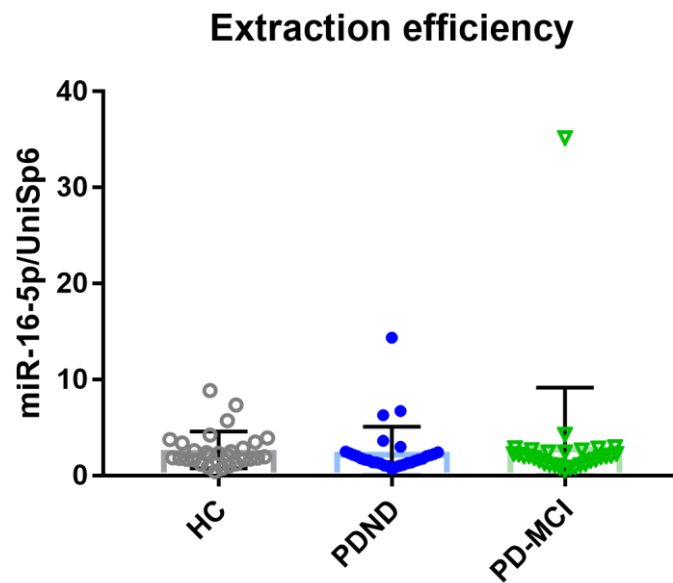

**Supplementary Figure 1.** The RNA extraction efficiency examination by the ratio of miR-16-5p/UniSp6. The external spike-in UniSp6 (0.5  $\mu$ l) was added to the lysis buffer before RNA extraction. The expression of miR-16-5p and UniSp6 were examined by ddPCR. The ratio of miR-16-5p/UniSp6 was analyzed using Kruskal-Wallis test followed by Dunn's multiple comparisons test (post-hoc test) among the groups of HC (n=29), PDND (n=30) and PD-MCI (n=30). Data are shown as Mean  $\pm$  SD.

**Supplementary Table 1.** The multivariate logistic regression model for detecting PDD.

| <b>Covariate</b> | <b>Coefficient</b> | <b>Estimated<br/>Standard Error</b> | <b>z value</b> | <b>p-value</b> |
|------------------|--------------------|-------------------------------------|----------------|----------------|
| Intercept        | -25.42314          | 8.42341                             | -3.018         | <0.01          |
| N203*            | 0.22671            | 0.08279                             | 2.738          | <0.01          |
| Age              | 0.23692            | 0.09185                             | 2.579          | <0.01          |
| UPDRS_III        | 0.19145            | 0.05594                             | 3.422          | <0.001         |

\*N203: the ratio of miR-203a-3p/miR16-5p.

**Supplementary Table 2.** The 95% confidence interval of specificity, sensitivity and accuracy for regression model by test dataset in a five-fold cross validation.

| Variables              | AUC<br>( 95% CI )         | Specificity<br>( 95% CI ) | Sensitivity<br>( 95% CI )   | Accuracy<br>( 95% CI )     |
|------------------------|---------------------------|---------------------------|-----------------------------|----------------------------|
| N203                   | 0.7593<br>(0.5370-0.9383) | 0.7222<br>(0.5000-0.9444) | 0.7777<br>(0.5528 -1.0000 ) | 0.7407<br>(0.5917-0.8889 ) |
| Age                    | 0.7654<br>(0.5617-0.929)  | 0.6667<br>(0.4444-0.8889) | 0.7778<br>(0.4444-1.0000)   | 0.7037<br>(0.5185-0.8889)  |
| UPDRS III              | 0.7932<br>(0.5709-0.9691) | 0.7778<br>(0.5556-0.9444) | 0.8889<br>(0.6667-1.0000)   | 0.8148<br>(0.6667-0.9630)  |
| N203 + Age             | 0.8642<br>(0.6914-0.9877) | 0.8333<br>(0.6667-1.0000) | 0.7778<br>(0.5528-1.0000)   | 0.8148<br>(0.6667-0.9630)  |
| N203 + UPDRS III       | 0.8827<br>(0.7344-0.9815) | 0.8333<br>(0.6667-1.0000) | 0.7778<br>(0.4444-1.0000)   | 0.8148<br>(0.6667-0.9630)  |
| Age + UPDRS III        | 0.8272<br>(0.6049-0.9815) | 0.7222<br>(0.5000-0.8889) | 0.8889<br>(0.6667-1.0000)   | 0.7778<br>(0.6296- 0.9259) |
| N203 + Age + UPDRS III | 0.8827<br>(0.7282-0.9938) | 0.8889<br>(0.7222-1.0000) | 0.7778<br>(0.4444-1.0000)   | 0.8519<br>(0.7037-0.9630)  |

\*N203: the ratio of miR-203a-3p/miR16-5p.

**Supplementary Table 3.** The experimental-based predicted pathways and target genes of miR-203a-3p via KEGG database analysis.

| Pathway                                   | p-value  | Target genes                                                                                                                              |
|-------------------------------------------|----------|-------------------------------------------------------------------------------------------------------------------------------------------|
| Hepatitis B                               | 2.73E-09 | AKT2,BIRC5,CDK6,CREB1,CXCL8,E2F1,E2F3,IL6,JUN,MAPK8,MAPK9,MYD88,PIK3CA,PRKCA,SMAD4,SRG,STAT1,TBK1,TNF                                     |
| Pathways in cancer                        | 5.04E-07 | ABL1,AKT2,BIRC5,CDH1,CDK6,CXCL8,E2F1,E2F3,EGLN1,FGF2,FZD2,GSK3B,IGF1R,IL6,JUN,MAPK8,MAPK9,MMP1,NCOA4,PIK3CA,PRKCA,SMAD2,SMAD4,STAT1,VEGFA |
| Pancreatic cancer                         | 3.68E-06 | AKT2,CDK6,E2F1,E2F3,MAPK8,MAPK9,PIK3CA,SMAD2,SMAD4,STAT1,VEGFA                                                                            |
| Chagas disease (American trypanosomiasis) | 2.75E-05 | AKT2,CALR,CXCL8,GNAS,IL6,JUN,MAPK8,MAPK9,MYD88,PIK3CA,SMAD2,TNF                                                                           |
| Ras signaling pathway                     | 3.09E-05 | ABL1,AKT2,EXOC2,FGF2,IGF1R,MAPK8,MAPK9,PIK3CA,PLD2,PRKACB,PRKCA,RAP1A,RASA2,RASAL2,RGL2,TBK1,VEGFA                                        |
| Influenza A                               | 4.16E-05 | AKT2,CXCL8,GSK3B,IL6,JUN,MAPK8,MAPK9,MYD88,PIK3CA,PRKCA,SOC3,STAT1,TBK1,TNF                                                               |
| Toll-like receptor signaling pathway      | 4.16E-05 | AKT2,CXCL8,IL6,JUN,MAPK8,MAPK9,MYD88,PIK3CA,STAT1,TBK1,TNF                                                                                |
| Colorectal cancer                         | 6.55E-05 | AKT2,BIRC5,GSK3B,JUN,MAPK8,MAPK9,PIK3CA,SMAD2,SMAD4                                                                                       |
| MicroRNAs in cancer                       | 6.55E-05 | ABL1,ATM,BCL2L2,BMI1,CDK6,E2F1,E2F3,PIK3CA,PRKCA,TP63,TRIM71,VEGFA,ZEB1,ZEB2                                                              |
| Prolactin signaling pathway               | 9.75E-05 | AKT2,GSK3B,MAPK8,MAPK9,PIK3CA,SOC3,SOC6,SRG,STAT1                                                                                         |
| Focal adhesion                            | 1.11E-04 | AKT2,CAV1,GSK3B,IGF1R,JUN,MAPK8,MAPK9,PIK3CA,PPP1CB,PRKCA,RAP1A,RAPGEF1,ROCK2,SRG,VEGFA                                                   |
| HTLV-I infection                          | 1.23E-04 | AKT2,ATM,CALR,CREB1,E2F1,E2F3,FZD2,GSK3B,IL6,JUN,MAPK8,PIK3CA,PRKACB,RAN,SMAD2,SMAD4,TNF                                                  |
| Hepatitis C                               | 1.63E-04 | AKT2,CXCL8,GSK3B,IFIT1,MAPK8,MAPK9,PIK3CA,SOC3,STAT1,TBK1,TNF                                                                             |
| Wnt signaling pathway                     | 2.27E-04 | CXXC4,FZD2,GSK3B,JUN,MAPK8,MAPK9,PRICKLE2,PRKACB,PRKCA,ROCK2,SMAD4,WIF1                                                                   |
| Dopaminergic synapse                      | 3.00E-04 | AKT2,CLOCK,CREB1,GNAS,GSK3B,KIF5B,MAPK8,MAPK9,PPP1CB,PRKACB,PRKCA                                                                         |
| FoxO signaling pathway                    | 3.56E-04 | AKT2,ATM,G6PC,IGF1R,IL6,MAPK8,MAPK9,PIK3CA,SMAD2,SMAD4,SOD2                                                                               |
| ErbB signaling pathway                    | 5.16E-04 | ABL1,AKT2,GSK3B,JUN,MAPK8,MAPK9,PIK3CA,PRKCA,SRG                                                                                          |
| Melanoma                                  | 5.30E-04 | AKT2,CDH1,CDK6,E2F1,E2F3,FGF2,IGF1R,PIK3CA                                                                                                |

|                                              |          |                                                                                             |
|----------------------------------------------|----------|---------------------------------------------------------------------------------------------|
| Herpes simplex infection                     | 6.53E-04 | <i>CLOCK,IFIT1,IL6,JUN,MAPK8,MAPK9,MYD88,PPP1CB,SOC<br/>S3,STAT1,TBK1,TNF</i>               |
| Bladder cancer                               | 8.25E-04 | <i>CDH1, CXCL8,E2F1,E2F3,MMP1,VEGFA</i>                                                     |
| Endocytosis                                  | 8.64E-04 | <i>ASAP1,CAV1,CCR5,IGF1R,PARD6B,PIP5K1A,PLD2,RAB22A,<br/>RNF41,SH3GLB1,SMAD2,SMURF2,SRC</i> |
| Proteoglycans in cancer                      | 8.64E-04 | <i>AKT2,CAV1,FGF2,FZD2,IGF1R,PIK3CA,PPP1CB,PRKACB,PR<br/>KCA,ROCK2,SMAD2,SRC,TNF,VEGFA</i>  |
| Osteoclast differentiation                   | 0.001    | <i>AKT2,CREB1,JUN,MAPK8,MAPK9,PIK3CA,SOCS3,STAT1,SY<br/>K,TNF</i>                           |
| TNF signaling pathway                        | 0.001    | <i>AKT2,CREB1,IL6,JUN,MAPK8,MAPK9,PIK3CA,SOCS3,TNF</i>                                      |
| Tuberculosis                                 | 0.001    | <i>AKT2,CREB1,IL6,MAPK8,MAPK9,MYD88,NFYA,SRC,STAT1,<br/>SYK,TNF</i>                         |
| Adherens junction                            | 0.002    | <i>CDH1, IGF1R,SMAD2,SMAD4,SNAI1,SNAI2,SRC</i>                                              |
| Fc epsilon RI signaling pathway              | 0.002    | <i>AKT2, MAPK8,MAPK9,PIK3CA,PRKCA,SYK,TNF</i>                                               |
| Glioma                                       | 0.002    | <i>AKT2, CDK6,E2F1,E2F3,IGF1R,PIK3CA,PRKCA</i>                                              |
| GnRH signaling pathway                       | 0.002    | <i>GNAS,JUN,MAPK8,MAPK9,PLD2,PRKACB,PRKCA,SRC</i>                                           |
| Insulin signaling pathway                    | 0.002    | <i>AKT2,G6PC,GSK3B,MAPK8,MAPK9,PIK3CA,PPP1CB,PRKAC<br/>B,RAPGEF1,SOCS3</i>                  |
| Neurotrophin signaling pathway               | 0.002    | <i>ABL1,AKT2,GSK3B,JUN,MAPK8,MAPK9,PIK3CA,RAP1A,RA<br/>PGEF1</i>                            |
| Non-alcoholic fatty liver disease<br>(NAFLD) | 0.002    | <i>AKT2,CXCL8,GSK3B,IL6,JUN,MAPK8,MAPK9,PIK3CA,SOCS<br/>3,TNF</i>                           |
| Pertussis                                    | 0.002    | <i>CXCL8, IL6,JUN,MAPK8,MAPK9,MYD88,TNF</i>                                                 |
| Rap1 signaling pathway                       | 0.002    | <i>AKT2,CDH1,FGF2,GNAS,IGF1R,PARD6B,PIK3CA,PRKCA,RA<br/>P1A,RAPGEF1,SRC,VEGFA</i>           |
| Renal cell carcinoma                         | 0.002    | <i>AKT2,EGLN1,JUN,PIK3CA,RAP1A,RAPGEF1,VEGFA</i>                                            |
| Chronic myeloid leukemia                     | 0.003    | <i>ABL1, AKT2,CDK6,E2F1,E2F3,PIK3CA,SMAD4</i>                                               |
| Non-small cell lung cancer                   | 0.003    | <i>AKT2, CDK6,E2F1,E2F3,PIK3CA,PRKCA</i>                                                    |
| Amphetamine addiction                        | 0.004    | <i>CREB1, GNAS,JUN,PPP1CB,PRKACB,PRKCA</i>                                                  |

|                                        |       |                                                                      |
|----------------------------------------|-------|----------------------------------------------------------------------|
| HIF-1 signaling pathway                | 0.004 | <i>AKT2,EGLN1,IGF1R,IL6,LDHA,PIK3CA,PRKCA,VEGFA</i>                  |
| Hippo signaling pathway                | 0.004 | <i>BIRC5,BMPR1A,CDH1,FZD2,GSK3B,PARD6B,PPP1CB,SMAD2,SMAD4,SNAI2</i>  |
| Salmonella infection                   | 0.004 | <i>CXCL8, IL6,JUN,MAPK8,MAPK9,MYD88,ROCK2</i>                        |
| Shigellosis                            | 0.004 | <i>ABL1, CXCL8,MAPK8,MAPK9,ROCK2,SRC</i>                             |
| TGF-beta signaling pathway             | 0.004 | <i>ACVR2B,BMPR1A,SMAD2,SMAD4,SMAD9,SMURF2,TNF</i>                    |
| Fc gamma R-mediated phagocytosis       | 0.005 | <i>AKT2,ASAP1,PIK3CA,PIP5K1A,PLD2,PRKCA,SYK</i>                      |
| Prostate cancer                        | 0.005 | <i>AKT2, CREB1,E2F1,E2F3,GSK3B,IGF1R,PIK3CA</i>                      |
| Toxoplasmosis                          | 0.005 | <i>AKT2,CCR5,MAPK8,MAPK9,MYD88,PIK3CA,STAT1,TNF</i>                  |
| Adipocytokine signaling pathway        | 0.006 | <i>AKT2, G6PC,MAPK8,MAPK9,SOCS3,TNF</i>                              |
| Chemokine signaling pathway            | 0.006 | <i>AKT2,CCR5,CXCL8,GSK3B,PIK3CA,PRKACB,RAP1A,ROCK2, SRC,STAT1</i>    |
| Type II diabetes mellitus              | 0.006 | <i>MAPK8, MAPK9,PIK3CA,SOCS3,TNF</i>                                 |
| Measles                                | 0.007 | <i>AKT2,CDK6,GSK3B,IL6,MYD88,PIK3CA,STAT1,TBK1</i>                   |
| African trypanosomiasis                | 0.008 | <i>IL6, MYD88,PRKCA,TNF</i>                                          |
| Cell cycle                             | 0.008 | <i>ABL1,ATM,CDK6,E2F1,E2F3,GSK3B,SMAD2,SMAD4</i>                     |
| Estrogen signaling pathway             | 0.008 | <i>AKT2, CREB1,GNAS,JUN,PIK3CA,PRKACB,SRC</i>                        |
| Jak-STAT signaling pathway             | 0.008 | <i>AKT2, IL24,IL6,IL7,LIFR,PIK3CA,SOCS3,STAT1</i>                    |
| Amoebiasis                             | 0.009 | <i>CXCL8, GNAS,IL6,PIK3CA,PRKACB,PRKCA,TNF</i>                       |
| Cytokine-cytokine receptor interaction | 0.009 | <i>ACVR2B,BMPR1A,CCR5,CXCL8,IL24,IL6,IL7,LIFR,TNF,TNFR SF9,VEGFA</i> |
| Pathogenic Escherichia coli infection  | 0.009 | <i>ABL1, CDH1,NCL,PRKCA,ROCK2</i>                                    |
| Epstein-Barr virus infection           | 0.01  | <i>AKT2,GSK3B,JUN,MAPK8,MAPK9,PIK3CA,PRKACB,RAN,SY K,TBK1</i>        |

|                                                            |       |                                                                             |
|------------------------------------------------------------|-------|-----------------------------------------------------------------------------|
| MAPK signaling pathway                                     | 0.01  | <i>AKT2,DUSP5,FGF2,JUN,MAP3K13,MAPK8,MAPK9,PRKACB,PRKCA,RAP1A,RASA2,TNF</i> |
| NOD-like receptor signaling pathway                        | 0.01  | <i>CXCL8, IL6,MAPK8,MAPK9,TNF</i>                                           |
| Rheumatoid arthritis                                       | 0.01  | <i>CXCL8, IL6,JUN,MMP1,TNF,VEGFA</i>                                        |
| Apoptosis                                                  | 0.011 | <i>AKT2, ATM,MYD88,PIK3CA,PRKACB,TNF</i>                                    |
| Progesterone-mediated oocyte maturation                    | 0.011 | <i>AKT2, IGF1R,MAPK8,MAPK9,PIK3CA,PRKACB</i>                                |
| Inflammatory bowel disease (IBD)                           | 0.012 | <i>IL6, JUN,SMAD2,STAT1,TNF</i>                                             |
| RIG-I-like receptor signaling pathway                      | 0.012 | <i>CXCL8, MAPK8,MAPK9,TBK1,TNF</i>                                          |
| VEGF signaling pathway                                     | 0.012 | <i>AKT2, PIK3CA,PRKCA,SRC,VEGFA</i>                                         |
| mTOR signaling pathway                                     | 0.012 | <i>AKT2, PIK3CA,PRKCA,TNF,VEGFA</i>                                         |
| Thyroid hormone signaling pathway                          | 0.014 | <i>AKT2,GSK3B,PIK3CA,PRKACB,PRKCA,SRC,STAT1</i>                             |
| Malaria                                                    | 0.016 | <i>CXCL8, IL6,MYD88,TNF</i>                                                 |
| Cocaine addiction                                          | 0.017 | <i>CREB1, GNAS,JUN,PRKACB</i>                                               |
| Epithelial cell signaling in Helicobacter pylori infection | 0.017 | <i>CXCL8, JUN,MAPK8,MAPK9,SRC</i>                                           |
| PI3K-Akt signaling pathway                                 | 0.017 | <i>AKT2,CDK6,CREB1,FGF2,G6PC,GSK3B,IGF1R,IL6,IL7,PIK3CA,PRKCA,SYK,VEGFA</i> |
| Melanogenesis                                              | 0.022 | <i>CREB1, FZD2,GNAS,GSK3B,PRKACB,PRKCA</i>                                  |
| B cell receptor signaling pathway                          | 0.024 | <i>AKT2, GSK3B,JUN,PIK3CA,SYK</i>                                           |
| Serotonergic synapse                                       | 0.024 | <i>ALOX15,GABRB1,GNAS,HTR2A,PRKACB,PRKCA</i>                                |
| Cholinergic synapse                                        | 0.027 | <i>AKT2, CREB1,KCNJ2,PIK3CA,PRKACB,PRKCA</i>                                |
| T cell receptor signaling pathway                          | 0.027 | <i>AKT2, GSK3B,JUN,MAPK9,PIK3CA,TNF</i>                                     |
| Adrenergic signaling in cardiomyocytes                     | 0.03  | <i>AKT2,CREB1,GNAS,PIK3CA,PPP1CB,PRKACB,PRKCA</i>                           |

|                                         |       |                                                        |
|-----------------------------------------|-------|--------------------------------------------------------|
| Vascular smooth muscle contraction      | 0.03  | <i>EDNRA, GNAS,PPP1CB,PRKACB,PRKCA,ROCK2</i>           |
| Vibrio cholerae infection               | 0.031 | <i>GNAS, PRKACB,PRKCA,TJP2</i>                         |
| Viral carcinogenesis                    | 0.031 | <i>CCR5,CDK6,CREB1,JUN,PIK3CA,PRKACB,RASA2,SRC,SYK</i> |
| Circadian rhythm                        | 0.033 | <i>CLOCK, CREB1,FBXL3</i>                              |
| Endometrial cancer                      | 0.033 | <i>AKT2, CDH1,GSK3B,PIK3CA</i>                         |
| GABAergic synapse                       | 0.033 | <i>GABRB1, PRKACB,PRKCA,SLC12A5,SRC</i>                |
| Transcriptional misregulation in cancer | 0.037 | <i>ATM, BMI1,CXCL8,IGF1R,IL6,RUNX2,SIX1,ZEB1</i>       |
| Legionellosis                           | 0.039 | <i>CXCL8, IL6,MYD88,TNF</i>                            |
| Morphine addiction                      | 0.041 | <i>GABRB1, GNAS,PDE7A,PRKACB,PRKCA</i>                 |
| NF-kappa B signaling pathway            | 0.041 | <i>ATM, CXCL8,MYD88,SYK,TNF</i>                        |
| Prion diseases                          | 0.041 | <i>IL6, PRKACB,PRNP</i>                                |
| Small cell lung cancer                  | 0.041 | <i>AKT2, CDK6,E2F1,E2F3,PIK3CA</i>                     |
| Gap junction                            | 0.042 | <i>GNAS, HTR2A,PRKACB,PRKCA,SRC</i>                    |
| Inositol phosphate metabolism           | 0.042 | <i>IPMK, PI4K2B,PIK3CA,PIP5K1A</i>                     |
| Tight junction                          | 0.042 | <i>AKT2, CASK,PARD6B,PRKCA,SRC,TJP2</i>                |
| Antigen processing and presentation     | 0.046 | <i>CALR, CREB1,NFYA,TNF</i>                            |
